# Supplementary material
Source: publisher site journal article supplement (https://www.spandidos-publications.com/2013/downloadSupplementary)

Figure S1. Knockdown of *E2F5* expression markedly reduces the proliferation rate of BT474 cells, but does not induce cell death. (A) BT474 cells were transfected with *E2F5* siRNA or control siRNA. Total RNA was extracted 48 h after transfection and analyzed for *E2F5* expression by real-time RT-qPCR.  $\beta$ -Actin was used as an internal control. (B) BT474 cells were transfected as described in A. Whole-cell lysates were prepared 48 h after transfection and subjected to immunoblotting.  $\beta$ -Actin was used as a loading control. (C) Viabilities of BT474 cells were measured by the standard WST8 assay from 1 to 5 days after transfection with *E2F5* siRNA (solid line) or with the control siRNA (dashed line). Data are presented as the means  $\pm$  SD of experiments performed in triplicate. \* $P < 0.05$ , \*\* $P < 0.01$ . (D and E) BT474 cells were transfected as described in A. Four days after transfection, floating and adherent cells were harvested and stained with propidium iodide. Their cell cycle distributions were then analyzed by FACS. The experiments were performed at least three times. Representative histograms are presented in D. *E2F5*, *E2F* transcription factor 5; RT-qPCR, reverse transcription-quantitative PCR; FACS, fluorescent-activated cell sorting.

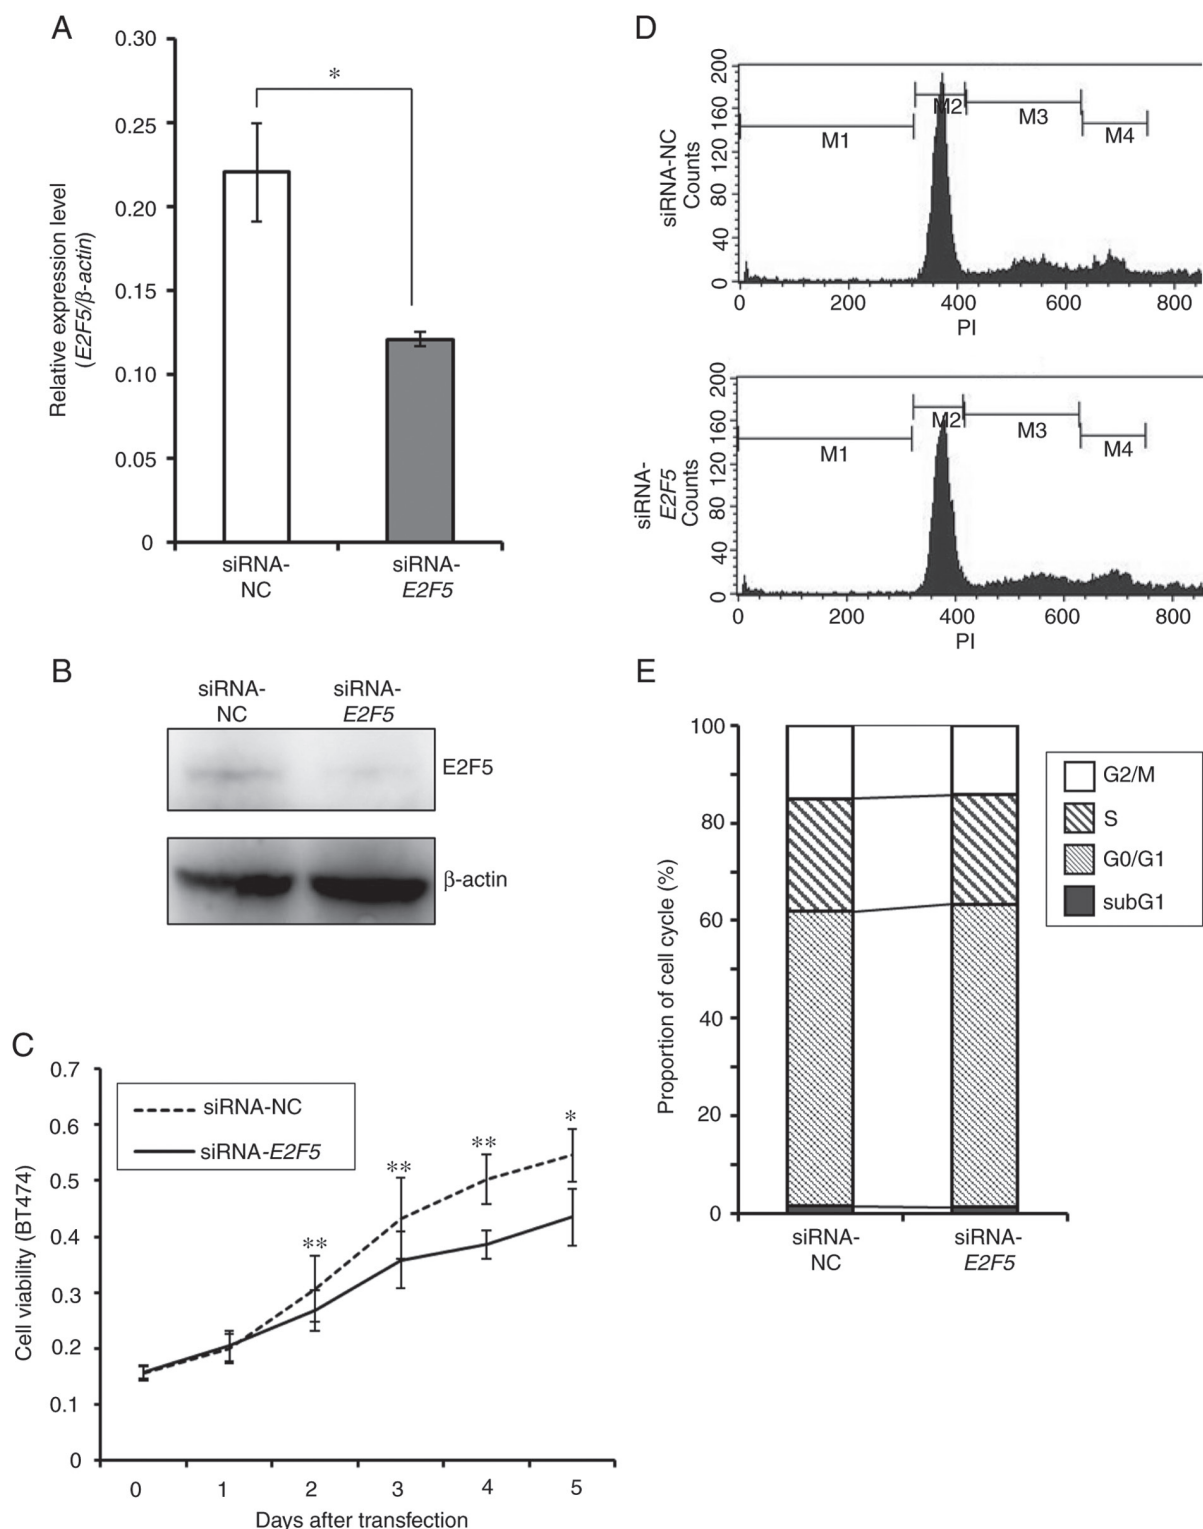

Figure S2. Silencing of *E2F5* has a marginal effect on the expression levels of TP53-target genes in BT474 cells. (A) BT474 cells were transfected as described in Fig. S1. Four days after transfection, total RNA was prepared and analyzed for *p21<sup>WAF1</sup>*, *BAX*, *NOXA*, and *PUMA* expression by real-time RT-qPCR.  $\beta$ -Actin was used as an internal control. Data are presented as the means  $\pm$  SD of experiments performed in triplicate. \*\* $P < 0.01$ . (B) BT474 cells were transfected as described in Fig. S1. Four days after transfection, cell lysates were prepared and analyzed for expression of TP53 and its target proteins by immunoblotting.  $\beta$ -Actin was used as a loading control. (C) The signal intensity of TP53 and phosphorylated TP53 at Ser-15 are presented. Data were normalized to the signal intensity of  $\beta$ -actin. The values over the bar graphs indicate the intensity ratio of phosphorylated TP53 to TP53. Data are presented as the means  $\pm$  SD of measurements performed in triplicate. \* $P < 0.05$ , \*\* $P < 0.01$ . E2F5, E2F transcription factor 5; RT-qPCR, reverse transcription-quantitative PCR.

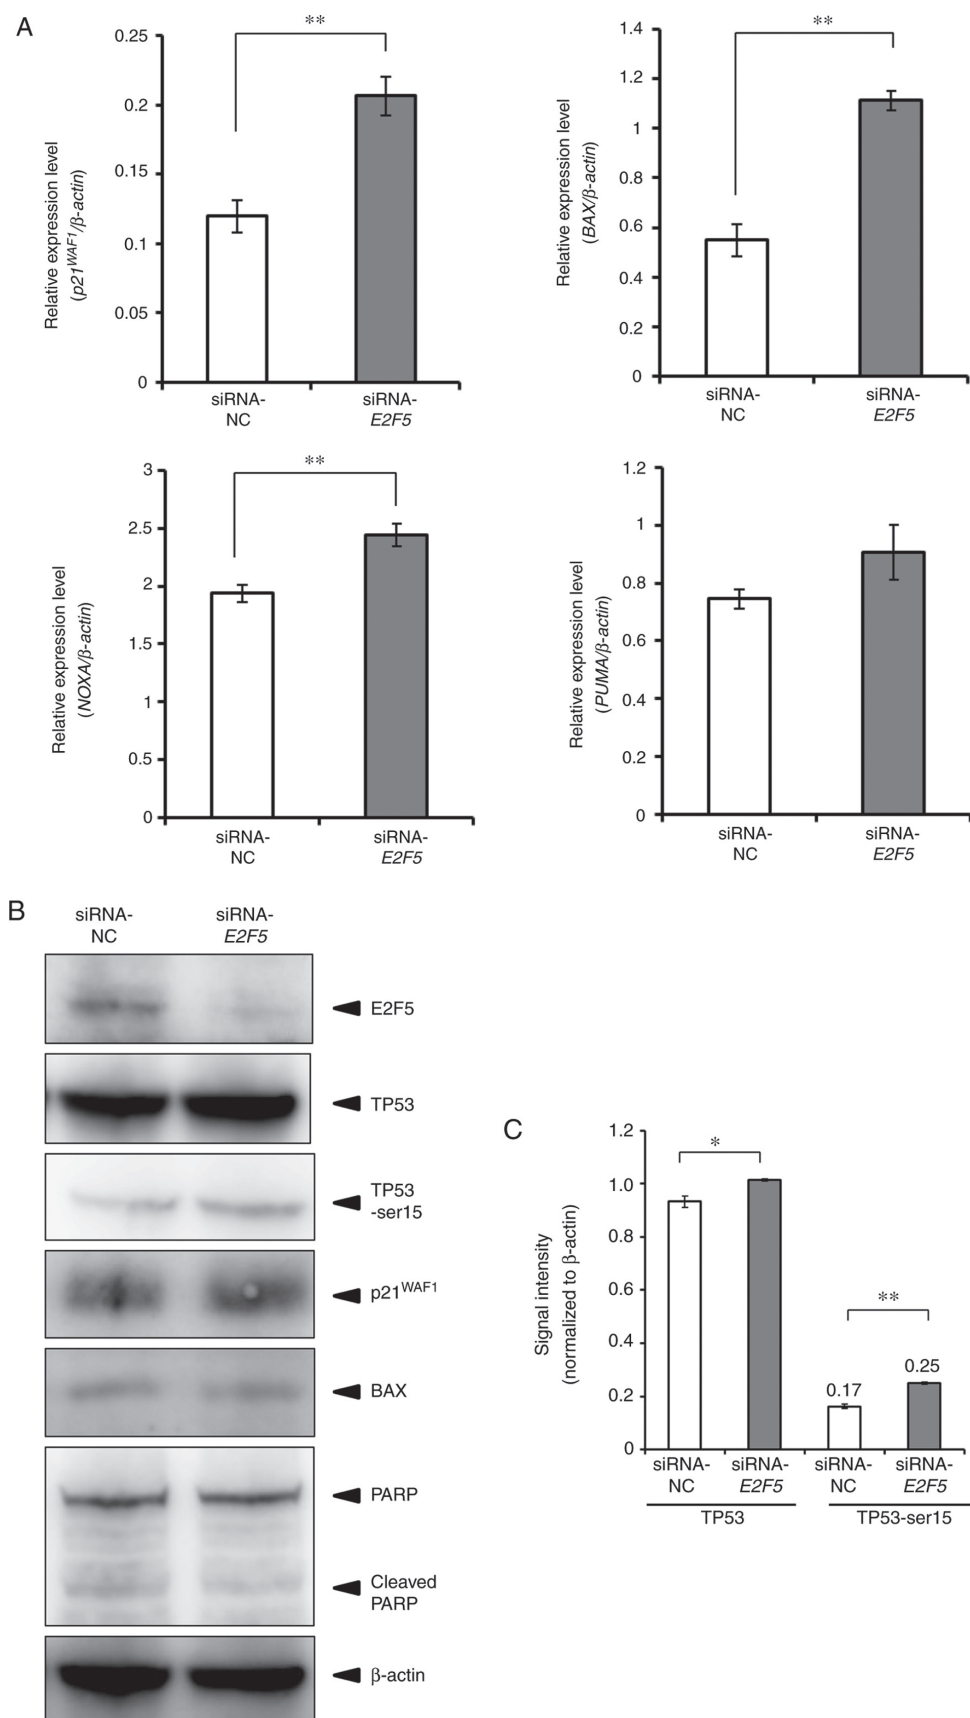

Supplement: Supplementary file 1 [file downloadSupplementary]
